# Supplementary material
Source: PubMed Central journal article supplement (PMC8918808)
Supplement: develop-149-200035-s1.pdf [file develop-149-200035-s1.pdf]

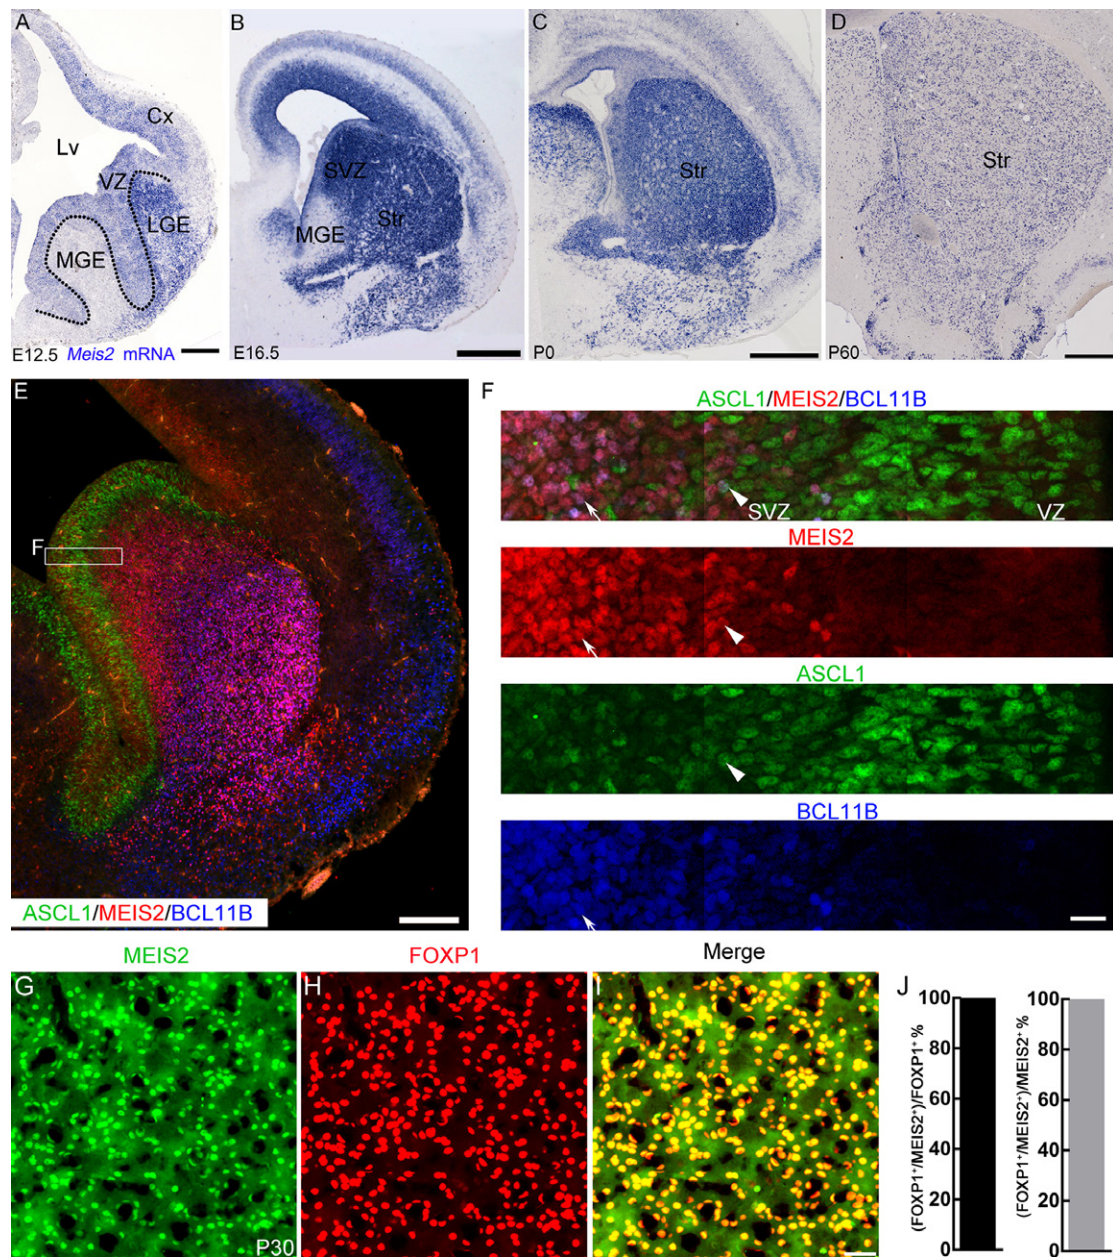

**Fig. S1. *Meis2* is strongly expressed in the MSNs from early embryonic to adult stage**

(A) At the early stage of E12.5, *Meis2* is strongly expressed in the LGE SVZ and relatively weakly expressed in the MGE, LGE, and cortical VZ. (B-D) ISH showed that *Meis2* was highly expressed in the whole striatum from the embryonic to adult stage. (E) ASCL1/MEIS2/BCL11B triple immunostaining coronal hemi-sections at E14.5. (F)

High magnification images of the boxed regions in E. Very few ASCL1-positive cells were co-labelled with MEIS2 (arrowhead), and the majority of BCL11B-positive cells were co-labelled with MEIS2 (arrow). (G-J) All FOXP1-positive cells were co-labelled with MEIS2 in the striatum at P30, and vice versa. Abbreviations: Cx (cortex); Lv (lateral ventricle); LGE (lateral ganglionic eminence); MGE (medial ganglionic eminence); VZ (ventricular zone); SVZ (subventricular zone); Str (striatum). Scale bars: 100  $\mu\text{m}$  in A; 200  $\mu\text{m}$  in B; 200  $\mu\text{m}$  in C; 500  $\mu\text{m}$  in D; 200  $\mu\text{m}$  in E; 100  $\mu\text{m}$  in F; 100  $\mu\text{m}$  in I for G-I.



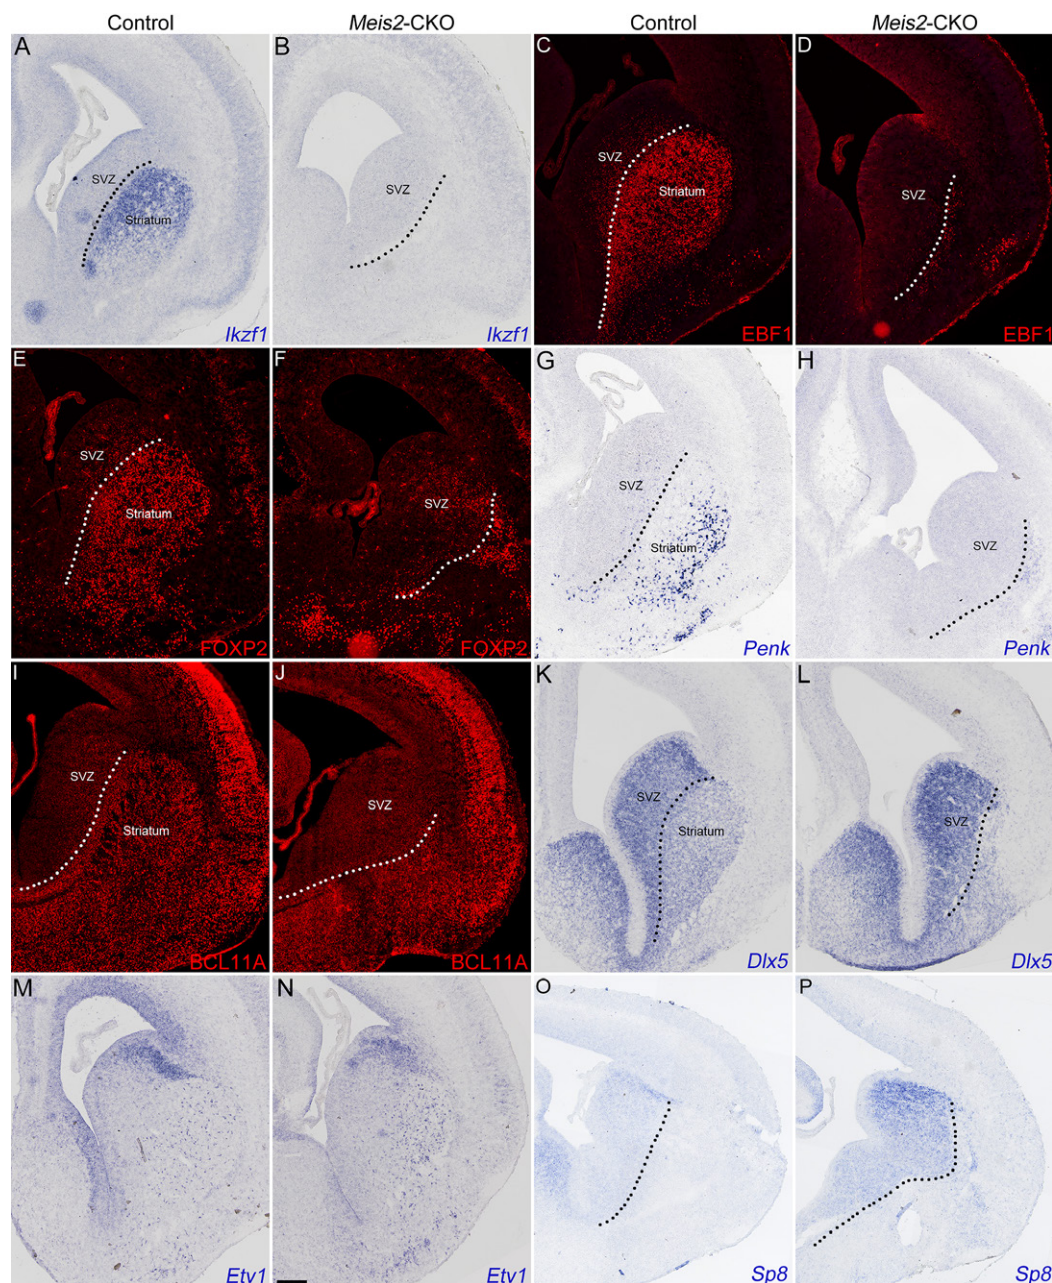

**Fig. S2. *Meis2* is required for the generation of striatal MSNs**

(A-J) At E16.5, the expression of *Ikzf1*, *EBF1*, *FOXP2*, *Penk* and *BCL11A* was greatly reduced in *Meis2*-CKO mice, compared to control mice. (K-L) Immature neurons that expressed *Dlx5* were generated in the LGE SVZ of *Meis2*-CKO mice. (M-N) There is no significant difference of the *Etv1* expression between *Meis2*-CKO mice and control mice. (O-P) The expression of the transcription factors *Sp8* are increased in the LGE.

Scale bars: 200  $\mu$ m in N for A-P.

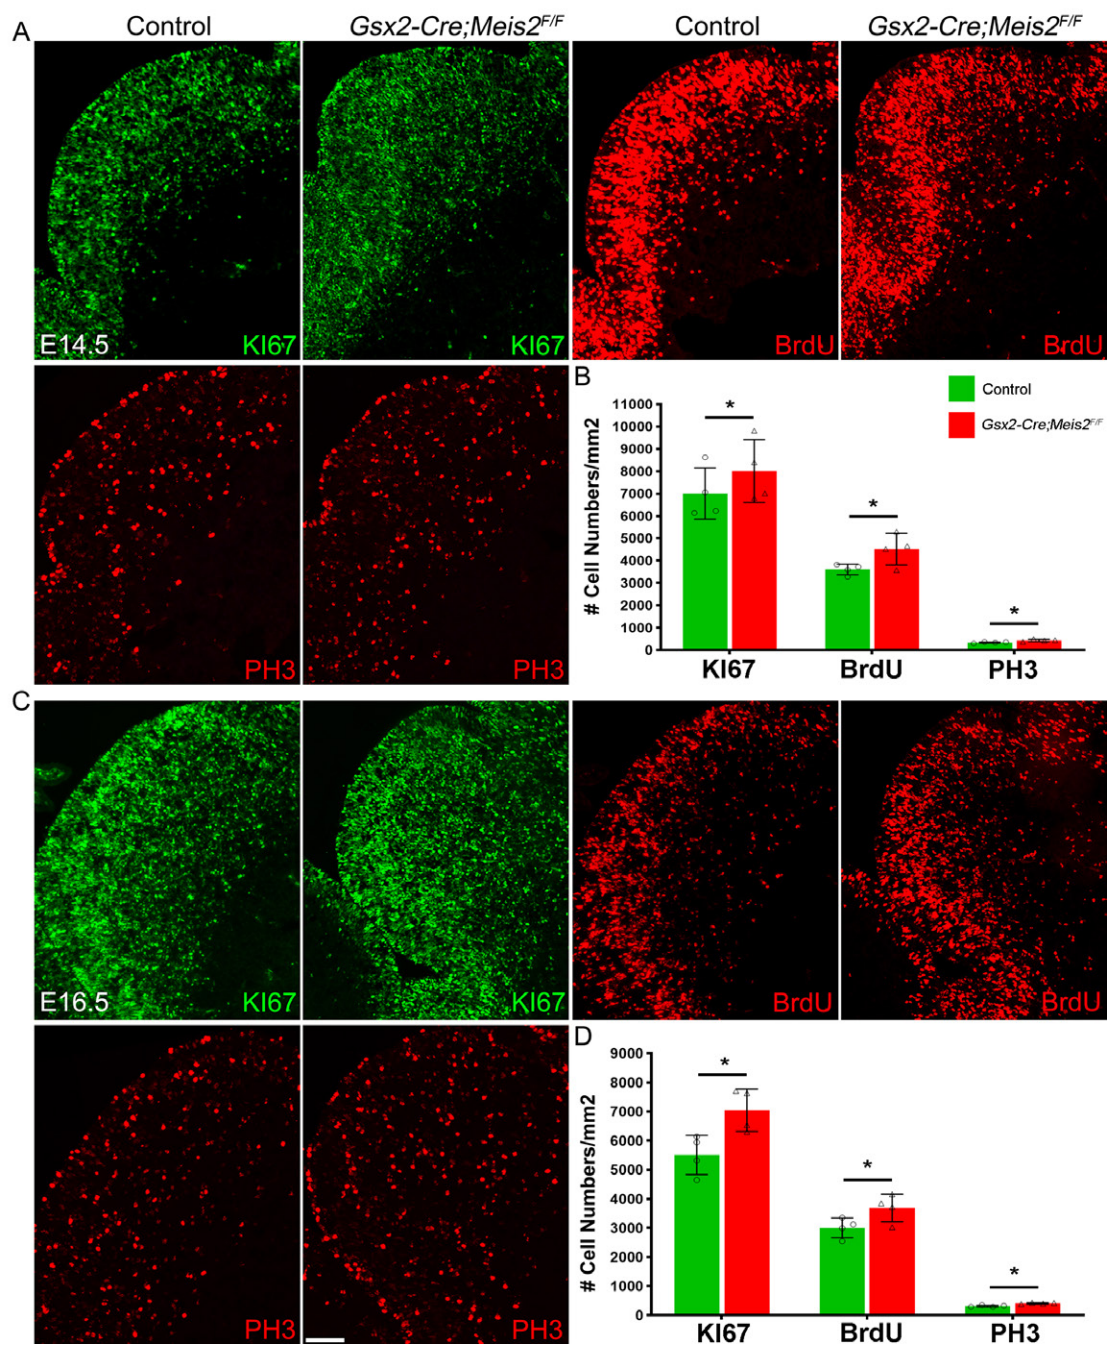

**Fig. S3. Cell proliferation is also increased in *Gsx2-Cre; Meis2<sup>F/F</sup>* mice**

(A-B) At E14.5, the number of KI67<sup>+</sup>, PH3<sup>+</sup>, and BrdU<sup>+</sup> (2 h) cells were increased in the LGE of *Gsx2-Cre; Meis2<sup>F/F</sup>* mice versus control. (C-D) At E16.5, the numbers of KI67<sup>+</sup>, PH3<sup>+</sup>, and BrdU<sup>+</sup> cells were also increased in the LGE of *Gsx2-Cre; Meis2<sup>F/F</sup>* mice. Scale bars: 50  $\mu$ m in C for A and C.



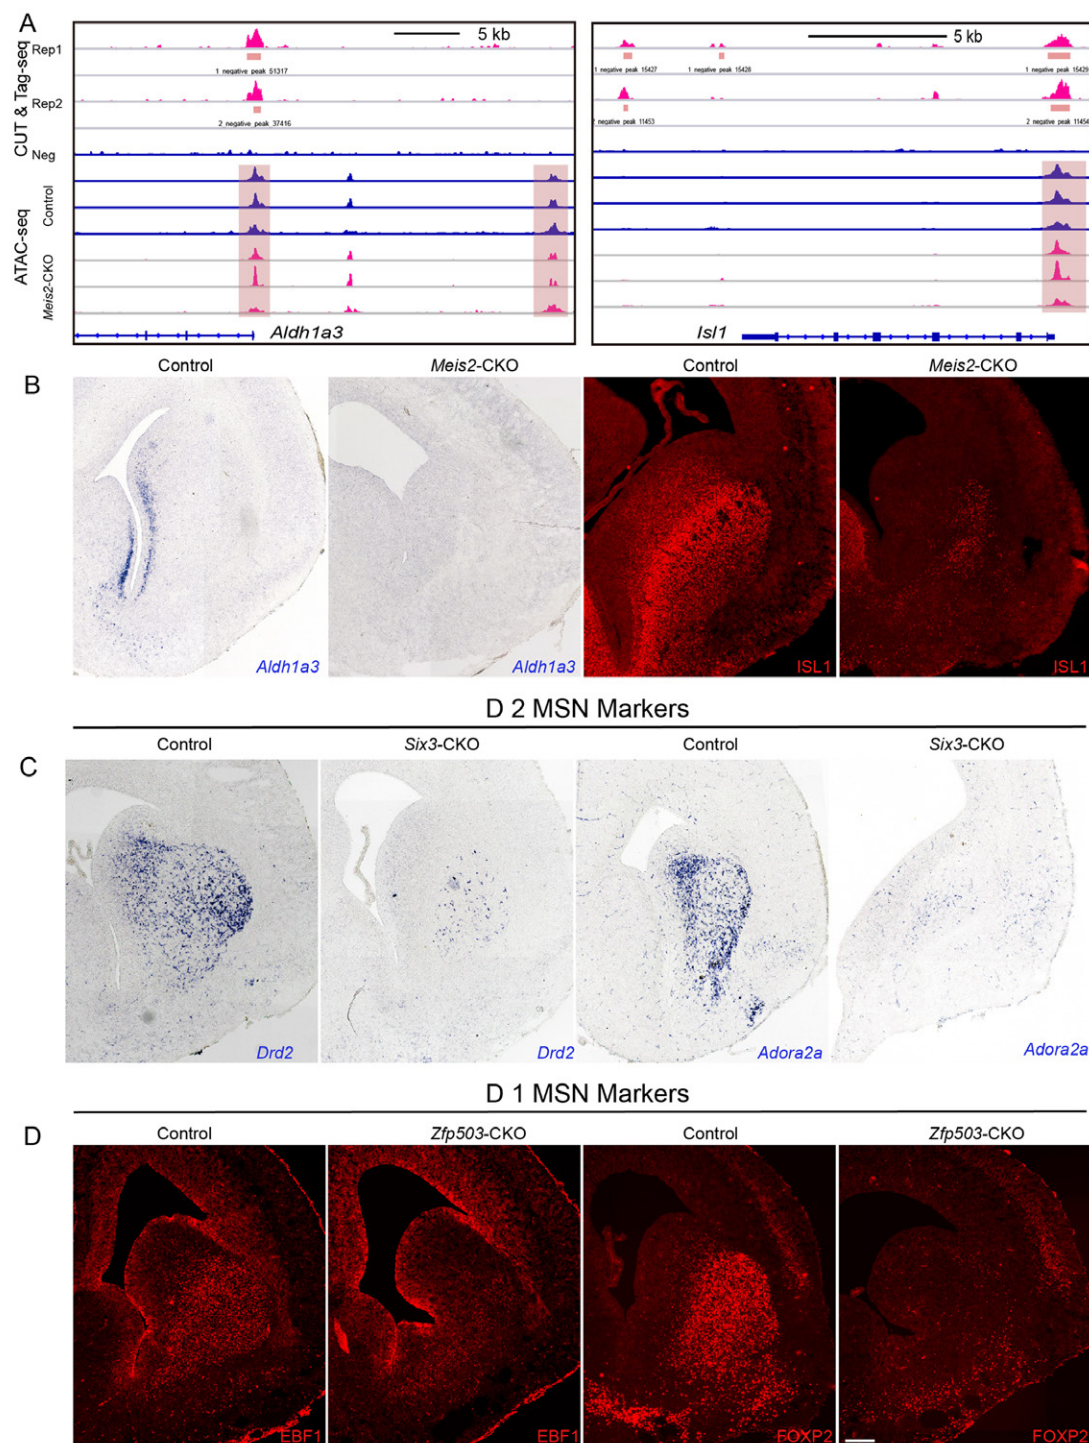

**Fig. S4: *Meis2* is required for the normal differentiation process of the MSNs**

(A) CUT&Tag-seq and ATAC-seq data showed that the expression of *Aldh1a3* and *Isl1* is directly regulated by *Meis2*. (B) At E16.5, the expression of *Aldh1a3* and *Isl1* was greatly reduced in *Meis2*-CKO mice compared to control mice. (C) ISH showed that the expression of *Drd2* and *Adora2a* was significantly reduced in the *Six3*-CKO mice. (D) Immunostaining showed that the expression of D1 MSN markers (*EBF1* and *FOXP2*) was significantly reduced in *Zfp503*-CKO mice. N = 3 mice per group; Scale bar: 200  $\mu$ m in D for B-D.

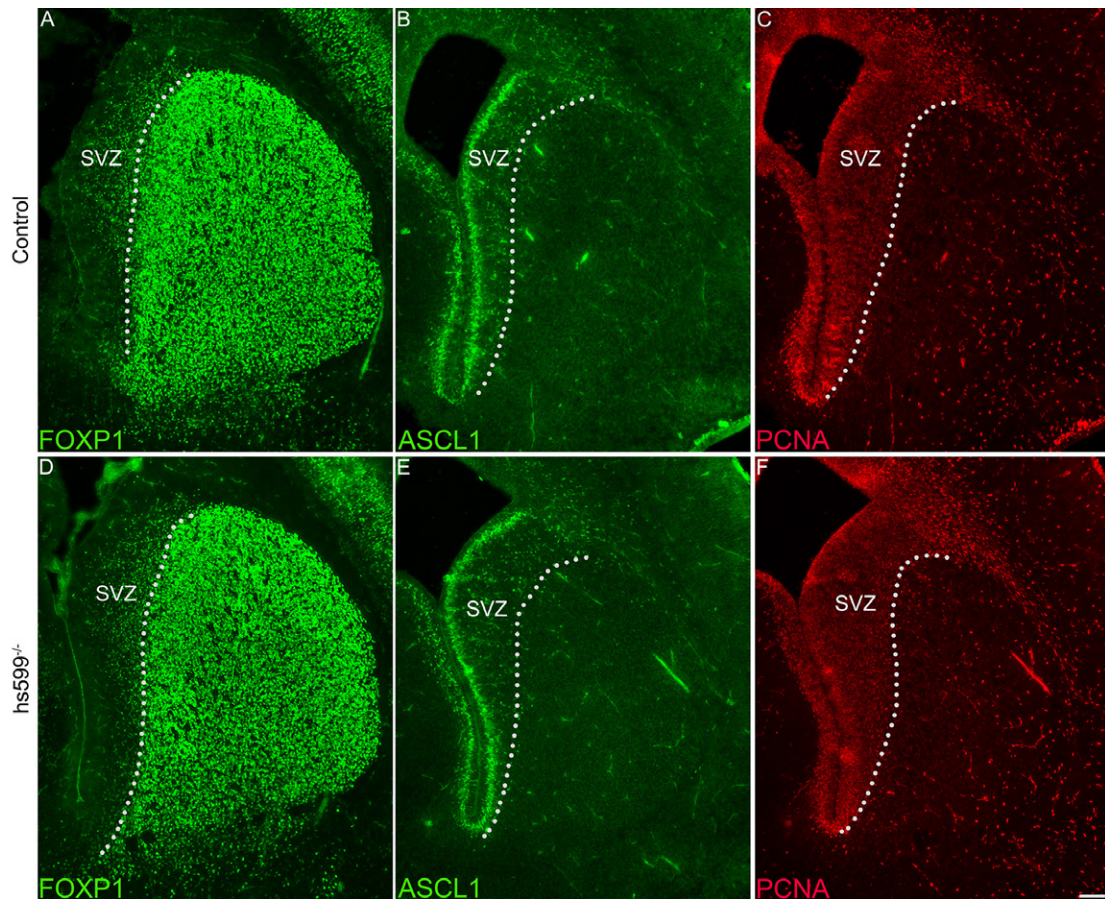

**Fig. S5. The development of the striatal MSNs is not significantly changed in *hs599*<sup>-/-</sup> mice**

(A, D) The expression of FOXP1 is not affected in the striatum of *hs599* mutant mice at E16.5. (B-C, E-F) The expression of the ASCL1 and PCNA is slightly increased in the *hs599* mutants compared to the control mice. Dotted lines mark the border of the LGE SVZ and striatum. Subventricular zone: SVZ. N = 3 mice per group; Scale bar: 100  $\mu$ m in F for A-F.



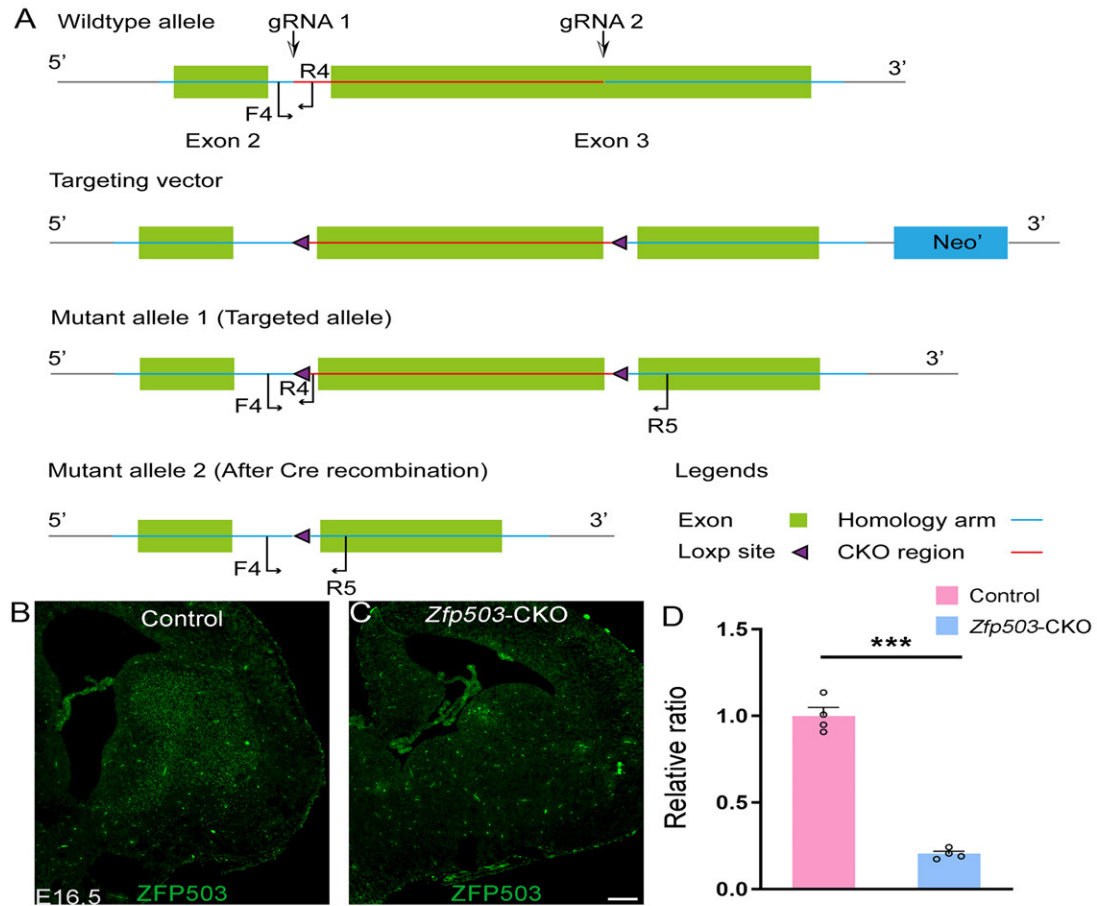

**E** RNA design

| Guide       | Sequence (5'-3')          |
|-------------|---------------------------|
| 5' Guide #1 | CACCGAGTAAGGTGACCAGC AGG  |
| 3' Guide #2 | AAAAGAAGCGAAGGTCTGGGA GGG |

**F** Genotyping primer design

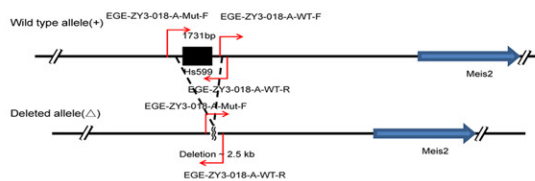

**G** Genotyping primer design

| Primer              | Sequence (5'-3')            | Tm (°C) | Product size (bp) |
|---------------------|-----------------------------|---------|-------------------|
| EGE-ZY3-018-A-WT-F  | GGAGAGATGTTGCTGCTAGTGAGGC   | 63      | WT-455            |
| EGE-ZY3-018-A-WT-R  | CGCTTGAGTCATTAACAGTGTGCC    | 62      | WT-2592           |
| EGE-ZY3-018-A-Mut-F | AACCCATTAACATCTGTGAGATGCTGC | 59      | Mut-583           |
| EGE-ZY3-018-A-WT-R  | CGCTTGAGTCATTAACAGTGTGCC    | 62      | Mut-583           |

Enzyme: 2x Taq Plus Master Mix II (Dye Plus)  
Program: 2x Taq Plus Master Mix II (Dye Plus) progress

|       |            |             |
|-------|------------|-------------|
| 95 °C | 3 min      | } 82 cycles |
| 95 °C | 15 sec     |             |
| 62 °C | 20 sec     |             |
| 72 °C | 1 kb / min |             |
| 72 °C | 7 min      |             |
| 4 °C  | hold       |             |

**H** Founder genotyping

Primers: EGE-ZY3-018-A-Mut-F/EGE-ZY3-018-A-WT-R

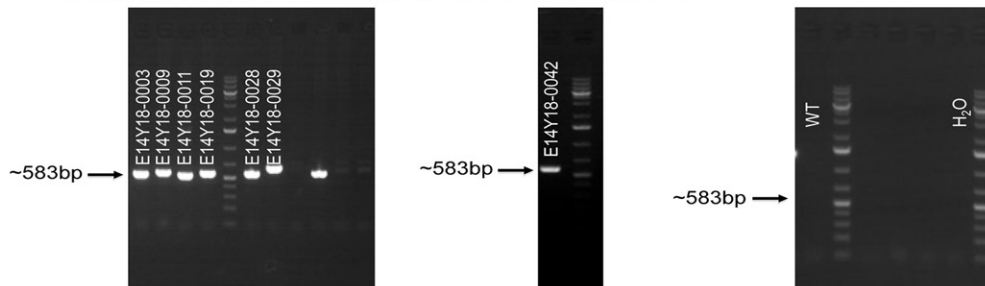

**Fig. S6. Generation of *Zfp503*-CKO and *hs599*<sup>+/-</sup> mice**

(A) Using the CRISPR/Cas9 strategy to generate *Zfp503*<sup>F/+</sup> mice. The coding region exon 3 was flanked by Loxp sites. After Cre recombination, exon 3 was deleted. (B-D) At E16.5, deletion of the *Zfp503* gene was confirmed at the protein level by immunostaining in the *Zfp503*-CKO striatum. \*\*\* $P < 0.001$  (two-tailed, unpaired Student's *t*-test),  $n = 4$  per group; Scale bar, 200  $\mu\text{m}$ . (E) The primer sequence of the gRNA. (F-H) Genotyping to confirm enhancer deletions and gel images showing genotyping results from wild-type (WT) and enhancer deletion mice. Genotyping from wild-type (WT) and enhancer deletion mice to confirm enhancer deletions and gel image.



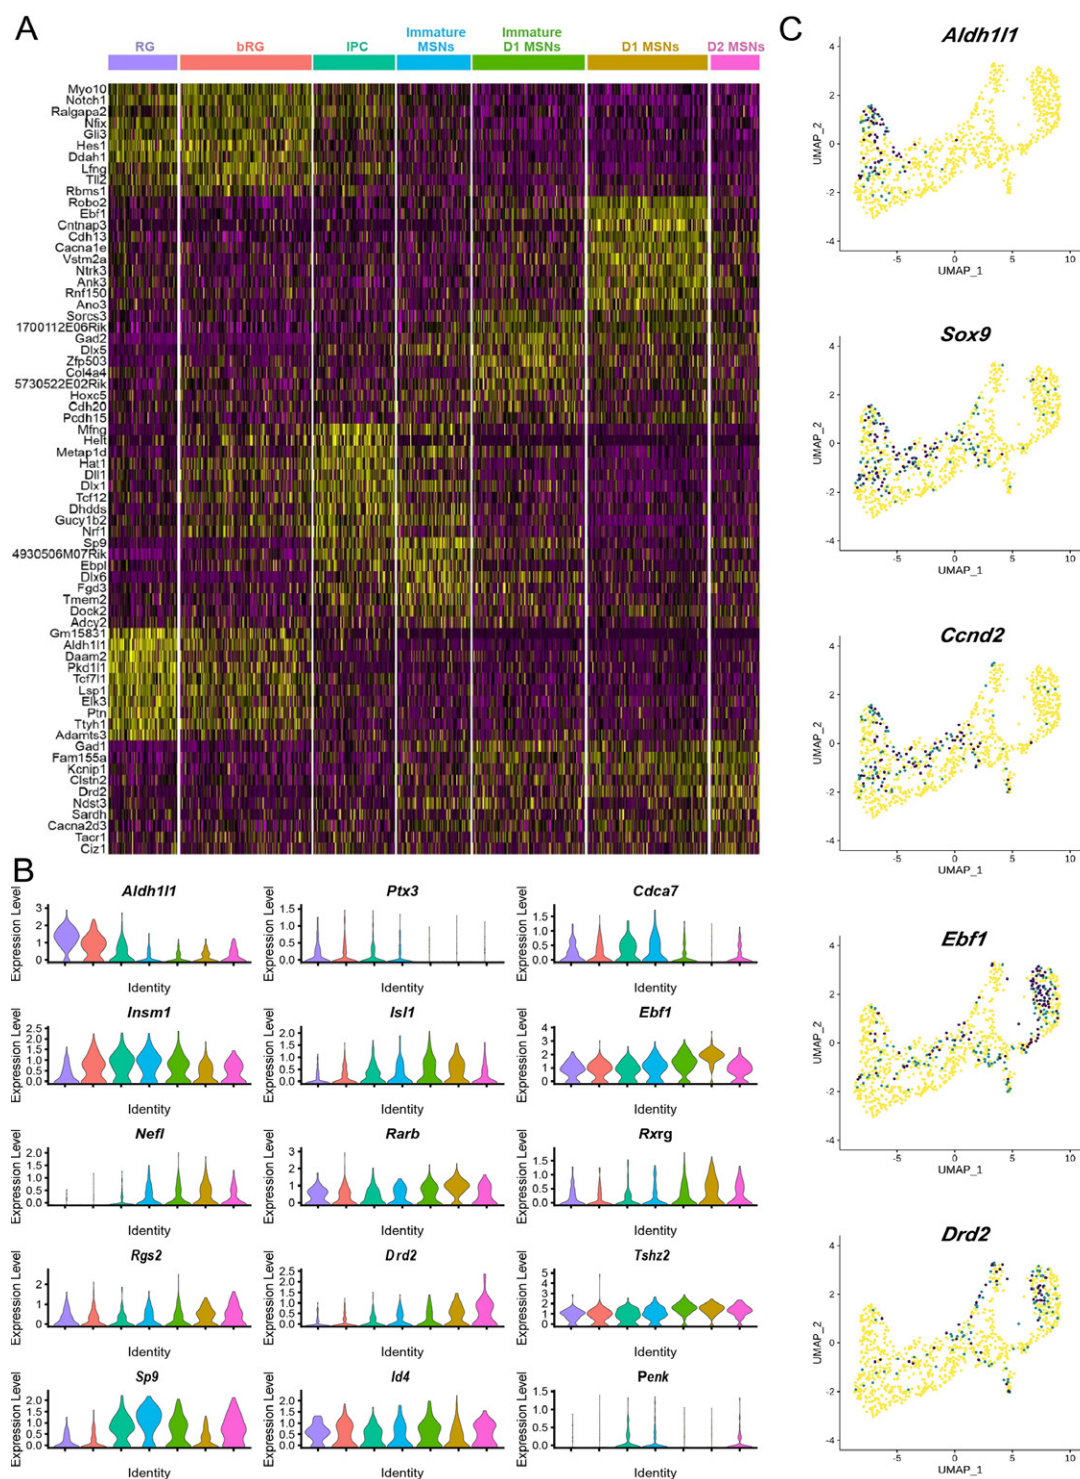

**Fig. S7. Analysis of sc-ATAC-seq at E14.5**

(A) Heat map showing the top 10 genes in the 7 clusters. (B) Violin plots showing the expression of the subtype cell markers. (C) UMAP plots showing distinct chromatin accessibility profiles of marker genes. progenitor cells.

**Table S1. RNA-seq data of the LGE at E14.5**

[Click here to download Table S1](#)

**Table S2. Key resources table**

| Reagent or Resource  | Source                                       | Identifier                   |
|----------------------|----------------------------------------------|------------------------------|
| <b>Antibodies</b>    |                                              |                              |
| Rabbit Anti-ASCL1    | Cosmo Bio                                    | SK-T01-003, Dilution: 1:2000 |
| Rat Anti-BCL11B      | Abcam                                        | ab18465, Dilution: 1:200     |
| Rat Anti-BrdU        | Accurate Chemical and Scientific Corporation | OBT0030S, Dilution: 1:200    |
| Rabbit Anti-CRE      | Millipore                                    | 69050, Dilution: 1:1000      |
| Rabbit Anti-DCX      | Abcam                                        | ab18723, Dilution: 1:1000    |
| Guinea Pig Anti-DLX2 | Gift from Kazuaki Yoshikawa                  | Dilution: 1:2000             |
| Rabbit Anti-EBF1     | Santa Cruz Biotechnology                     | sc-15888, Dilution: 1:500    |
| Rabbit Anti-FOXP1    | Abcam                                        | ab16645, Dilution: 1:2000    |
| Goat Anti-FOXP2      | Abcam                                        | ab58599, Dilution: 1:500     |
| Chicken Anti-GFP     | Aves labs                                    | GFP-1020, Dilution: 1:2000   |
| Rabbit Anti-GSX2     | Millipore                                    | ABN162, Dilution: 1:2000     |
| Rabbit Anti-ISL1     | Abcam                                        | ab20670, Dilution: 1:800     |
| Mouse Anti-MEIS2     | Santa Cruz Biotechnology                     | sc-515470, Dilution: 1:500   |
| Mouse Anti-PCNA      | Abcam                                        | ab29, Dilution: 1:1000       |
| Rabbit Anti-PH3      | Millipore                                    | 06-570, Dilution: 1:1500     |
| Rabbit Anti-SP9      | Our Laboratory                               | Dilution: 1:500              |

|                  |                          |                            |
|------------------|--------------------------|----------------------------|
| Rabbit Anti-KI67 | Vector Labs              | VP-K451, Dilution: 1:500   |
| Mouse Anti- SIX3 | Santa Cruz Biotechnology | sc-398797, Dilution: 1:800 |
| Mouse Anti-TUBB3 | Covance                  | MMS-435P, Dilution: 1:500  |

#### Experimental models

|                                     |                                                                            |                                                           |
|-------------------------------------|----------------------------------------------------------------------------|-----------------------------------------------------------|
| Mouse: C57BL/6                      | Department of laboratory Animal science at Fudan University                | <a href="http://10.107.12.196/">http://10.107.12.196/</a> |
| Mouse: CD1                          | Department of laboratory Animal science at Fudan University                | <a href="http://10.107.12.196/">http://10.107.12.196/</a> |
| Mouse: <i>Meis2</i> <sup>F/+</sup>  | This manuscript                                                            | N/A; Available from the authors                           |
| Mouse: <i>Six3</i> <sup>F/+</sup>   | Gift from Guillermo Oliver at Northwestern University                      | N/A; Available from the authors                           |
| Mouse: <i>Dlx5/6-CIE</i>            | Gift from Kenneth Campbell at University of Cincinnati College of Medicine | N/A; Available from the authors                           |
| Mouse: <i>Gsx2-Cre</i>              | The Jackson Laboratory                                                     | 025806                                                    |
| Mouse: <i>Dlx1/2</i> <sup>+/-</sup> | Gift from John L. Rubenstein at University of California                   | N/A; Available from the authors                           |
| Mouse: <i>Zfp503</i> <sup>F/+</sup> | This manuscript                                                            | N/A; Available from the authors                           |

#### Software and algorithms

|                                             |                   |                                                                         |
|---------------------------------------------|-------------------|-------------------------------------------------------------------------|
| Photoshop CC                                | Adobe Systems Inc | RRID: SCR_014199                                                        |
| Olympus VS120 digital slice scanning system | Olympus           | N/A                                                                     |
| Prism v.7                                   | GraphPad          | N/A                                                                     |
| CellRanger v2.1.1                           | 10X Genomics      | <a href="https://www.10xgenomics.com/">https://www.10xgenomics.com/</a> |



|                  |                         |                                                                                                                                     |
|------------------|-------------------------|-------------------------------------------------------------------------------------------------------------------------------------|
|                  |                         | <a href="#">solutions/single-cell/</a>                                                                                              |
| FASTQC v0.11.5   | Babraham Bioinformatics | <a href="https://www.bioinformatics.babraham.ac.uk/projects/fastqc/">https://www.bioinformatics.babraham.ac.uk/projects/fastqc/</a> |
| UMI Tools v0.5.4 | ((Li et al., 2021))     | <a href="https://github.com/CGATOxford/UMI-tools">https://github.com/CGATOxford/UMI-tools</a>                                       |

## Recombinant DNA

|         |         |           |
|---------|---------|-----------|
| pCAGIG  | Addgene | Cat#11159 |
| pGL4.10 | Promega | Cat#E6651 |
| pGL4.23 | Promega | Cat#E8411 |

All secondary antibodies were from Jackson ImmunoResearch Labs.

| Secondary Antibodies                                                                           | Cat Number  | Dilution Ratio |
|------------------------------------------------------------------------------------------------|-------------|----------------|
| Alexa®488-conjugated Affinipure Donkey Anti-Rabbit IgG (H <sup>+</sup> L)                      | 711-545-152 | 1:500          |
| Cy <sup>TM</sup> 3-conjugated Affinipure Donkey Anti-Rabbit IgG (H <sup>+</sup> L)             | 711-165-152 | 1:500          |
| Alexa®488-conjugated Affinipure Donkey Anti-Mouse IgG (H <sup>+</sup> L)                       | 715-545-151 | 1:500          |
| Cy <sup>TM</sup> 3-conjugated Affinipure Donkey Anti-Mouse IgG (H <sup>+</sup> L)              | 715-165-151 | 1:500          |
| Alexa®488-conjugated Affinipure Donkey Anti-Chicken IgY <sup>++</sup> (IgG) (H <sup>+</sup> L) | 703-545-155 | 1:500          |
| Cy <sup>TM</sup> 3-AffiniPure Donkey Anti-Goat IgG (H <sup>+</sup> L)                          | 705-505-147 | 1:500          |
| Cy <sup>TM</sup> 3-AffiniPure Donkey Anti-Rat IgG (H <sup>+</sup> L)                           | 712-165-150 | 1:500          |
| Cy <sup>TM</sup> 3-AffiniPure Donkey Anti-Guinea Pig IgG (H <sup>+</sup> L)                    | 706-165-148 | 1:500          |

**Table S3. Primer sequences**

| Probe Name     | Primer Sequence                      |
|----------------|--------------------------------------|
| <i>Rarb</i>    | Primer F: AAGGGCTTTTTCCGCAGAAGTAT    |
|                | Primer R: AGCAGTGGTGA CTGACTGACTCCA  |
| <i>Rxrg</i>    | Primer F: GGACAGATCCTCAGGGAAGCACTA   |
|                | Primer R: GCCACCTTTAACAGCCGTACAAAA   |
| <i>Six3</i>    | Primer F: AGAGTTGTCCATGTTCCAGTTG     |
|                | Primer R: CTGATTTCCGGTTTGTCTAGGG     |
| <i>Zfp503</i>  | Primer F: TCCCAGGGACAGACAAACTGCT     |
|                | Primer R: TACAAGGGATCGGAGGGTTTGTT    |
| <i>Meis2</i>   | Primer F: AGAGCATGCCAGGGGACTACGT     |
|                | Primer R: CTCCGCAGCATGGTTCTTTTCTC    |
| <i>Ikzf1</i>   | Primer F: TTGTTCACTGGTAGCTGAGGTTTCC  |
|                | Primer R: GGGAACCTGTACTGGTCACACTGTG  |
| <i>Gad1</i>    | Primer F: ATGGCATCTTCCACTCCTTCG      |
|                | Primer R: TTACAGATCCTGACCCAACCTCTC   |
| <i>Penk</i>    | Primer F: TCGGAAGGACAGGATGTCATCA     |
|                | Primer R: CGTCAGGAGAGATGAGGTAACAAAC  |
| <i>Dlx5</i>    | Primer F: CAGCTTTCAGCTGGCCGCTT       |
|                | Primer R: CAAGGCACCATTGATAGTGTCCACA  |
| <i>Aldh1a3</i> | Primer F: GTGCTCACCAGGGAGTGTTCTTCA   |
|                | Primer R: TCTGCCTTAGATGGGCCTATGTCG   |
| <i>Adora2a</i> | Primer F: ATGGGCTCCTCGGTGTACATCATG   |
|                | Primer R: TCAGGAAGGGGCAA ACTCTGAAGAC |
| <i>Drd2</i>    | Primer F: CGGGAGCTGGAAGCCTCGA        |
|                | Primer R: TGCAGGGTCAAGAGAAGGCCG      |

## Supplementary Materials and Methods

*Signac package code:*

```
library(Signac)
library(Seurat)
library(GenomeInfoDb)
library(EnsDb.Mmusculus.v79)
library(ggplot2)
library(patchwork)
library(dplyr)
set.seed(1234)

counts <- Read10X_h5(filename = "../filtered_peak_bc_matrix.h5")
metadata <- read.csv(file = "../singlecell.csv",header = TRUE, row.names = 1)
chrom_assay <- CreateChromatinAssay(counts = counts,sep = c(":", "-"),genome =
'mm10', fragments = '../fragments.tsv.gz', min.cells = 1)
pbmc <- CreateSeuratObject(counts = chrom_assay, assay = "peaks", meta.data =
metadata)
annotations <- GetGRangesFromEnsDb(ensdb = EnsDb.Mmusculus.v79)
seqlevelsStyle(annotations) <- 'UCSC' genome(annotations) <- "mm10"
Annotation(pbmc) <- annotations
pbmc <- NucleosomeSignal(object = pbmc)
pbmc <- TSSEnrichment(object = pbmc, fast = FALSE)
pbmc$pct_reads_in_peaks <- pbmc$peak_region_fragments / pbmc$passed_filters *
100
pbmc$blacklist_ratio <- pbmc$blacklist_region_fragments /
pbmc$peak_region_fragments
pbmc$high.tss <- ifelse(pbmc$TSS.enrichment > 2, 'High', 'Low')
TSSPlot(pbmc, group.by = 'high.tss') + NoLegend()
pbmc$nucleosome_group <- ifelse(pbmc$nucleosome_signal > 4, 'NS > 4', 'NS < 4')
FragmentHistogram(object = pbmc, group.by = 'nucleosome_group')
```



```
pbmc <- subset(x = pbmc, subset = peak_region_fragments > 3000
&peak_region_fragments < 80000 &pct_reads_in_peaks > 40 &blacklist_ratio < 0.01
& nucleosome_signal < 4 & TSS.enrichment > 2.5)
pbmc <- RunTFIDF(pbmc)
pbmc <- FindTopFeatures(pbmc, min.cutoff = 'q0')
pbmc <- RunSVD(pbmc)
pbmc <- RunUMAP(object = pbmc, reduction = 'lsi', dims = c(2:50))
pbmc <- FindNeighbors(object = pbmc, reduction = 'lsi', dims = c(2:50))
pbmc <- FindClusters(object = pbmc, verbose = FALSE, algorithm = 3, resolution = 1)
gene.activities <- GeneActivity(pbmc)
pbmc[['ATAC']] <- CreateAssayObject(counts = gene.activities)
pbmc <- NormalizeData(object = pbmc, assay = 'ATAC', normalization.method =
'LogNormalize', scale.factor = 10000)
```
